# Supplementary material
Source: MDPI journal article supplement (https://www.mdpi.com/2624-7402/6/1/49)

**Supplementary material to the manuscript *Evaluation of a System to Assess Herbicide Movement in Straw Under Dry and Wett Conditions*****Table S1.** Main physicochemical and agronomic characteristics of herbicides evaluated in sugarcane straw transposition experiments

| Herbicide          | Chemica group         | Physicochemical characteristics <sup>a</sup> |                     |                  |                         |                               |                   | Agronomic characteristics <sup>b</sup> |              |            |          |
|--------------------|-----------------------|----------------------------------------------|---------------------|------------------|-------------------------|-------------------------------|-------------------|----------------------------------------|--------------|------------|----------|
|                    |                       | Sw                                           | Log K <sub>ow</sub> | pK               | K <sub>oc</sub>         | PV                            | GUS               | MoA                                    | Spectrum     | Time       | Uptake   |
| Atrazine           | Triazine              | 35 (low)                                     | 2.70 (moderate)     | 1.7 (weak base)  | 100 (moderately mobile) | 0.04 (low)                    | 3.20 (high)       | PSII                                   | Dico         | POST       | Systemic |
| Diuron             | Phenylureia           | 42 (low)                                     | 2.87 (moderate)     | Non-ionizable    | 480 (not mobile)        | 1.15 × 10 <sup>-3</sup> (low) | 1.83 (transition) | PSI                                    | Dico & Mono  | PRE & POST | Systemic |
| Fomesafen          | Diphenyl ether        | Salt: >500 (high)<br>Acid: 50 (low)          | -1.20 (low)         | 2.7 (weak acid)  | 60 (mobile)             | 4.00 × 10 <sup>-3</sup> (low) | 3.18 (high)       | PPO                                    | Dico         | POST       | Topic    |
| Glyphosate         | Substituted glycine   | >500 (high)                                  | -3.22 (low)         | 2.3 (weak acid)  | 20,000 (not mobile)     | 0.01 (low)                    | -0.25 (low)       | EPSPS                                  | Dico & Mono  | POST       | Systemic |
| Haloxypop-P-methyl | Aryloxyphenoxypionate | 7.9 (low)                                    | 4.07 (high)         | 4.33 (weak acid) | 75 (moderately mobile)  | 0.055 (low)                   | 3.70 (high)       | ACCase                                 | Mono         | PRE & POST | Systemic |
| Hexazinone         | Triazinone            | 33,000 (high)                                | 1.17 (low)          | 2.2 (weak base)  | 54 (mobile)             | 0.03 (low)                    | 4.43 (high)       | PSII                                   | Dico & Mono  | PRE & POST | Topic    |
| Indaziflam         | Alkylazine            | 2.8 (low)                                    | 2.8 (moderate)      | 3.5 (weak acid)  | 1000 (not mobile)       | 2.5 × 10 <sup>-5</sup> (low)  | 2.18 (transition) | CS                                     | Dico & Mono  | PRE        | Systemic |
| S-metolachlor      | Chloroacetamide       | 480 (moderate)                               | 3.05 (high)         | Non-ionizable    | 200 (moderately mobile) | 3.7 (low)                     | 1.91 (transition) | VLCFA                                  | Dico & Mono* | PRE        | Systemic |
| Sulfentrazone      | Aryl triazolinone     | 780 (high)                                   | 0.99 (low)          | 6.56 (weak acid) | 43 (mobile)             | 1.30 × 10 <sup>-4</sup> (low) | 6.16 (high)       | PPO                                    | Dico & Mono  | PRE & POST | Systemic |

<sup>a</sup>Sw – solubility water; Log K<sub>ow</sub> – octanol-water partition coefficient; pK – Acid/base electrolytic dissociation potential; K<sub>oc</sub> – Sorption-desorption coefficient; PV – Vapor pressure, tendency of an herbicide to volatilize; GUS – air-water partition coefficient, relationship between Sw and PV that indicates the volatilization potential as a function of soil moisture.

<sup>b</sup>MoA – Mode of action: PSII – Inhibition of photosystem II; PSI – Inhibition of photosystem I; PPO – Inhibition of Protoporphyrinogen Oxidase; EPSPS – Inhibition of Enolpyruvyl Shikimate Phosphate Synthase; ACCase – Inhibition of Acetyl Coenzyme A Carboxylase; CS – Inhibition of Cellulose Synthesis; VLCFA – Inhibition of Very Long-Chain Fatty Acid Synthesis. Spectrum: mono - monocotyledons; dico – dicotyledons; Time: application period: PRE – pre-emergence; post – post-emergence.



Figure S1. Chromatograms obtained for the different herbicides (50 L<sup>-1</sup>)

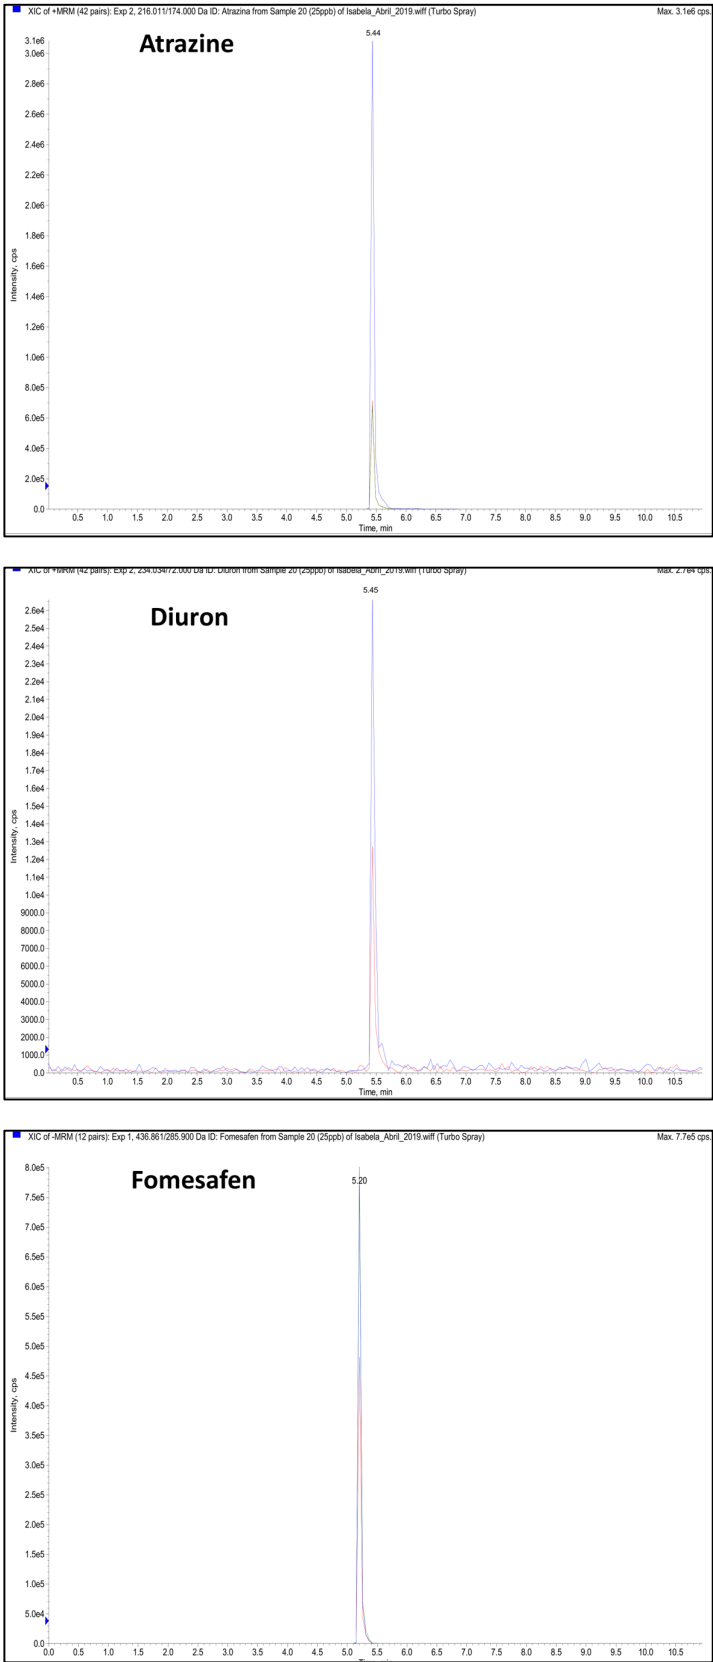

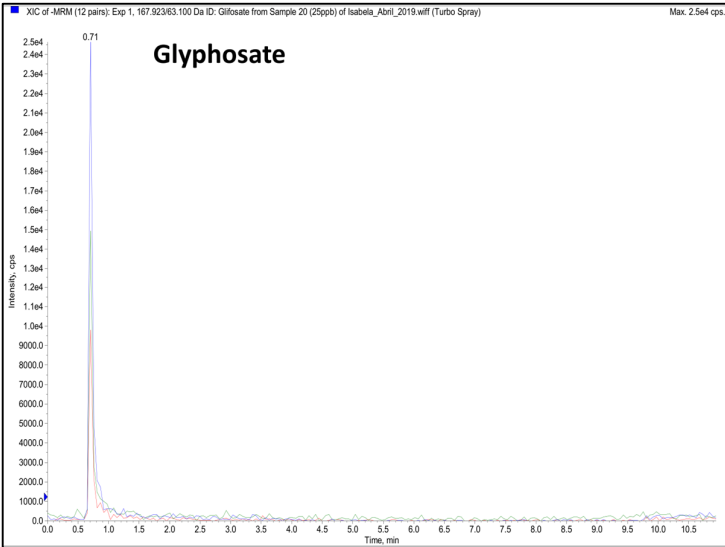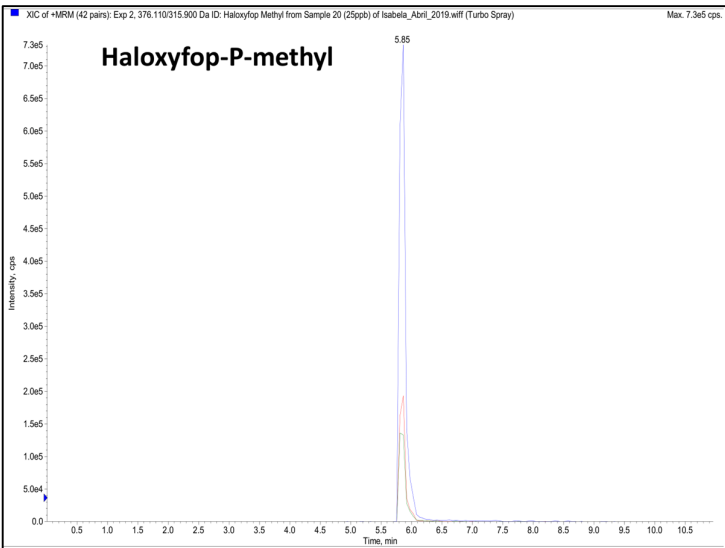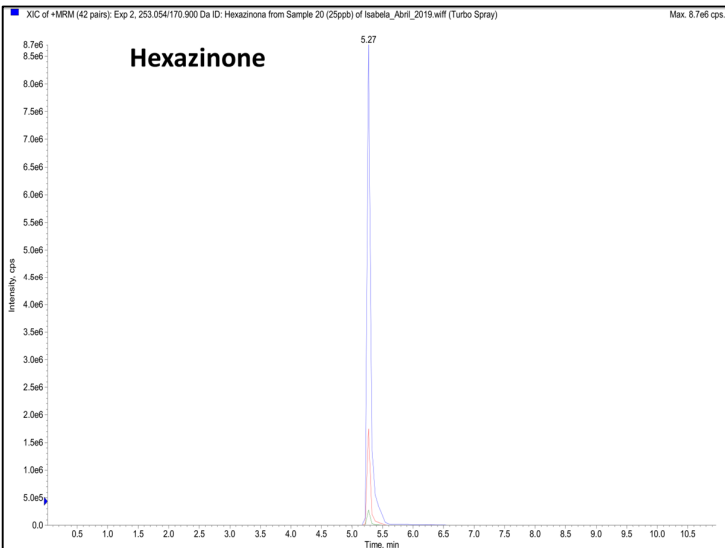

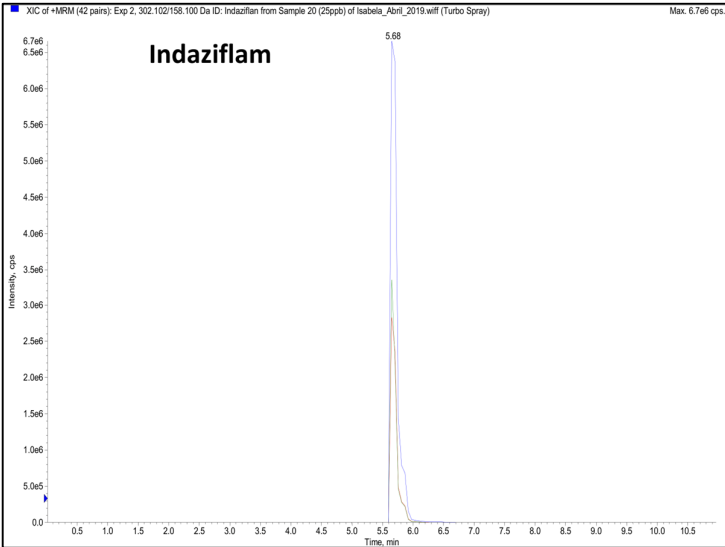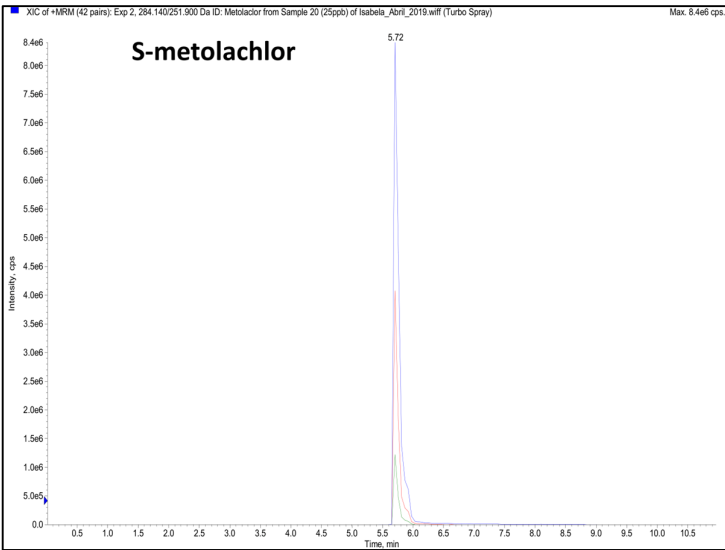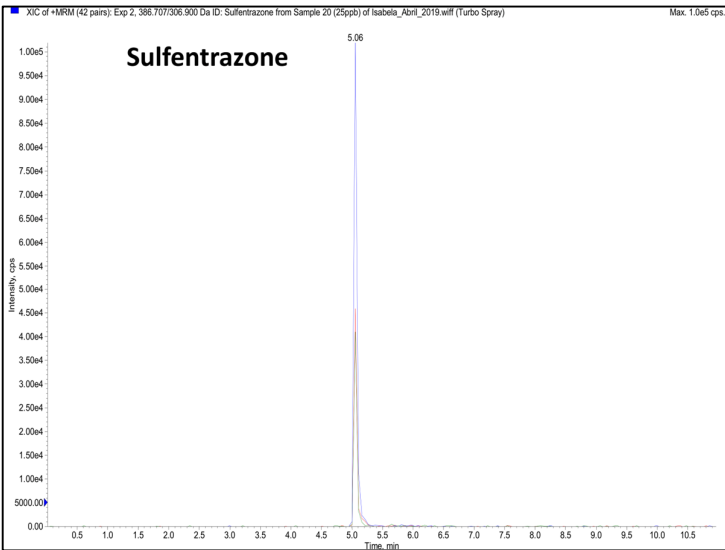

Supplement: s1 [file s1]
